# Supplementary material for: Co-Occurrence and Levels of Mycotoxins in Fish Feeds in Kenya
Source: PubMed Central journal article supplement (PMC7600487; doi:10.3390/toxins12100627), 2020-09-30
Supplement: toxins-12-00627-s001.pdf [file toxins-12-00627-s001.pdf]

# Supplementary Materials: Co-Occurrence and Levels of Mycotoxins in Fish Feeds in Kenya

Evalyn Wanjiru Mwhia, Jan Ludvig Lyche, Paul Gichohi Mbuthia, Lada Ivanova, Silvio Uhlig, James K. Gathumbi, Joyce G. Maina, Eric Emali Eshitera and Gunnar Sundstøl Eriksen

**Table S1.** Mycotoxins prevalence and levels in complete feeds, complementary feeds and feed ingredient samples.

| Mycotoxin    | Feed Type     | Prevalence % (x) | Range $\mu\text{g}/\text{kg}$ | Mean $\pm$ SD $\mu\text{g}/\text{kg}$ | 10th Percentile $\mu\text{g}/\text{kg}$ | 25th Percentile $\mu\text{g}/\text{kg}$ | Median $\mu\text{g}/\text{kg}$ | 75th Percentile $\mu\text{g}/\text{kg}$ | 90th Percentile $\mu\text{g}/\text{kg}$ |
|--------------|---------------|------------------|-------------------------------|---------------------------------------|-----------------------------------------|-----------------------------------------|--------------------------------|-----------------------------------------|-----------------------------------------|
| AFB1         | Complete      | 43 (10)          | <14.7–43.6                    | 13.4 $\pm$ 11.8                       | <14.7                                   | <14.7                                   | <14.7                          | 13.6                                    | 24.9                                    |
|              | Complementary | 39 (9)           | <14.7–16.6                    | 8.4 $\pm$ 3.1                         | <14.7                                   | <14.7                                   | <14.7                          | <14.7                                   | 9.2                                     |
|              | Ingredient    | 17 (4)           | <14.7–17.3                    | 7.4 $\pm$ 17.3                        | <14.7                                   | <14.7                                   | <14.7                          | <14.7                                   | 9.8                                     |
| AFG1         | Complete      | 100 (1)          | <155.8                        | 77.9                                  | <155.8                                  | <155.8                                  | <155.8                         | <155.8                                  | <155.8                                  |
|              | Complementary | 0 (0)            | -                             | -                                     | -                                       | -                                       | -                              | -                                       | -                                       |
|              | Ingredient    | 0 (0)            | -                             | -                                     | -                                       | -                                       | -                              | -                                       | -                                       |
| AF           | Complete      | 43 (10)          | <14.7–93.6                    | 21.2 $\pm$ 28.1                       | <14.7                                   | <14.7                                   | <14.7                          | 18.9                                    | 48.6                                    |
|              | Complementary | 39 (9)           | <14.7–16.6                    | 8.4 $\pm$ 3.1                         | <14.7                                   | <14.7                                   | <14.7                          | <14.7                                   | 9.2                                     |
|              | Ingredient    | 17 (4)           | <14.7–17.3                    | 7.4 $\pm$ 17.3                        | <14.7                                   | <14.7                                   | <14.7                          | <14.7                                   | 9.8                                     |
| DON          | Complete      | 56 (33)          | <40.4–465.1                   | 80.2 $\pm$ 107.8                      | <40.4                                   | <40.4                                   | <40.4*                         | 82.8                                    | 205                                     |
|              | Complementary | 27 (16)          | <40.4–819.9                   | 273.9 $\pm$ 236.4                     | <40.4                                   | <40.4                                   | 262.8                          | 439.4                                   | 505.2                                   |
|              | Ingredient    | 17 (10)          | <40.4–778.7                   | 20.2 $\pm$ 778.7                      | <40.4                                   | 129.9                                   | 208.2                          | 208.2                                   | 439.9                                   |
| DON3G        | Complete      | 25 (5)           | <46.8–72.8                    | 33.3 $\pm$ 22.1                       | <46.8                                   | <46.8                                   | <46.8                          | <46.8                                   | 53                                      |
|              | Complementary | 45 (9)           | <46.8–97.5                    | 36.3 $\pm$ 26.8                       | <46.8                                   | <46.8                                   | <46.8                          | <46.8                                   | 71.7                                    |
|              | Ingredient    | 30 (6)           | <46.8                         | 23.4                                  | <46.8                                   | <46.8                                   | <46.8                          | <46.8                                   | <46.8                                   |
| ZEN          | Complete      | 32 (10)          | <38.0–367.8                   | 76.0 $\pm$ 119.2                      | <38.0                                   | <38.0                                   | <38.0                          | 39.0                                    | 229.1                                   |
|              | Complementary | 45 (14)          | <38.0–757.9                   | 174.3 $\pm$ 209.9                     | <38.0                                   | <38.0                                   | 98.4                           | 225.5                                   | 392.1                                   |
|              | Ingredient    | 23 (7)           | <38.0–424.1                   | 19.0 $\pm$ 424.2                      | 30.6                                    | 48.6                                    | 111.6                          | 111.6                                   | 181.8                                   |
| $\alpha$ ZEL | Complete      | 26 (5)           | <22.2–42.7                    | 24.6 $\pm$ 13.8                       | <22.2                                   | <22.2                                   | 25.1                           | 32.8                                    | 38.7                                    |
|              | Complementary | 47 (9)           | <22.2–288.4                   | 82.9 $\pm$ 99.4                       | <22.2                                   | <22.2                                   | <22.2                          | 131.5                                   | 198.2                                   |
|              | Ingredient    | 26 (5)           | <22.2–158.1                   | 11.1 $\pm$ 158.1                      | 17.3                                    | 26.7                                    | 42.5                           | 42.5                                    | 64.1                                    |
| $\beta$ ZEL  | Complete      | 54 (14)          | <16.0–64.5                    | 23.6 $\pm$ 19.5                       | <16.0                                   | <16.0                                   | 14.7                           | 34.7                                    | 50.2                                    |
|              | Complementary | 35 (9)           | <16.0–79.8                    | 40.6 $\pm$ 29.3                       | <16.0                                   | <16.0                                   | 39.9                           | 64.9                                    | 77.6                                    |
|              | Ingredient    | 12 (3)           | <16.0–48.7                    | 26.9 $\pm$ 48.7                       | 29.9                                    | 34.3                                    | 41.7                           | 41.7                                    | 45.2                                    |
| FUMB1        | Complete      | 38 (16)          | <63.0–311.2                   | 100.7 $\pm$ 95.4                      | <63.0                                   | <63.0                                   | <63.0                          | 161.8                                   | 231.3                                   |
|              | Complementary | 40 (17)          | <63.0–1427.4                  | 324.1 $\pm$ 403.0                     | <63.0                                   | <63.0                                   | 137.2                          | 451.2                                   | 871                                     |
|              | Ingredient    | 21 (9)           | <63.0–1239.3                  | 31.5 $\pm$ 1239.3                     | 67.7                                    | 99.3                                    | 214.3                          | 214.3                                   | 542.6                                   |
| FUMB2        | Complete      | 26 (6)           | <68.9–91.4                    | 43.9 $\pm$ 23.3                       | <68.9                                   | <68.9                                   | <68.9                          | <68.9                                   | 62.9                                    |
|              | Complementary | 48 (11)          | <68.9–649.2                   | 145.8 $\pm$ 185.1                     | <68.9                                   | <68.9                                   | <68.9                          | 197.1                                   | 232.8                                   |
|              | Ingredient    | 26 (6)           | <68.9–495.2                   | 34.5 $\pm$ 495.2                      | <68.9                                   | <68.9                                   | 79.7                           | 79.7                                    | 157.5                                   |
| FUMB         | Complete      | 38 (16)          | <63.0–345.7                   | 117.2 $\pm$ 113.9                     | <63.0                                   | <63.0                                   | <63.0*                         | 219.5                                   | 267.3                                   |
|              | Complementary | 40 (17)          | <63.0–2076.6                  | 418.4 $\pm$ 553.2                     | <63.0                                   | 66.0                                    | 212.1                          | 485.7                                   | 1099.4                                  |
|              | Ingredient    | 21 (9)           | <63.0–1734.5                  | 31.5 $\pm$ 1734.5                     | 67.7                                    | 99.3                                    | 248.8                          | 248.8                                   | 667.5                                   |
| ECO          | Complete      | 55 (6)           | 37.6–49.5                     | 41.5 $\pm$ 4.2                        | 38.2                                    | 39.1                                    | 40.5                           | 42.0                                    | 45.9                                    |

| Mycotoxin | Feed Type     | Prevalence % (x) | Range µg/kg  | Mean ± SD µg/kg | 10th Percentile µg/kg | 25th Percentile µg/kg | Median µg/kg | 75th Percentile µg/kg | 90th Percentile µg/kg |
|-----------|---------------|------------------|--------------|-----------------|-----------------------|-----------------------|--------------|-----------------------|-----------------------|
| ECR       | Complementary | 36 (4)           | 38.9–64.3    | 55.5 ± 11.3     | 45.0                  | 54.1                  | 59.4         | 60.7                  | 62.9                  |
|           | Ingredient    | 9 (1)            | 51.3         | 51.3            | 51.3                  | 51.3                  | 51.3         | 51.3                  | 51.3                  |
|           | Complete      | 100 (1)          | <24.9        | <24.9           | <24.9                 | <24.9                 | <24.9        | <24.9                 | <24.9                 |
| ENV       | Complementary | 0 (0)            | -            | -               | -                     | -                     | -            | -                     | -                     |
|           | Ingredient    | 0 (0)            | -            | -               | -                     | -                     | -            | -                     | -                     |
|           | Complete      | 67 (2)           | <21.9        | <21.9           | <21.9                 | <21.9                 | <21.9        | <21.9                 | <21.9                 |
| ESN       | Complementary | 33 (1)           | <21.9        | <21.9           | <21.9                 | <21.9                 | <21.9        | <21.9                 | <21.9                 |
|           | Ingredient    | 0 (0)            | -            | -               | -                     | -                     | -            | -                     | -                     |
|           | Complete      | 80 (4)           | <38.4–38.5   | 24.0 ± 9.7      | <38.4                 | <38.4                 | <38.4        | 24.0                  | 32.7                  |
| ETA       | Complementary | 20 (1)           | 144.2        | 144.2           | 144.2                 | 144.2                 | 144.2        | 144.2                 | 144.2                 |
|           | Ingredient    | 0 (0)            | -            | -               | -                     | -                     | -            | -                     | -                     |
|           | Complete      | 100 (9)          | <29.3–1895.6 | 301.5 ± 602.5   | 28.9                  | 58.5                  | 87.2         | 166.6                 | 585.1                 |
| αECP      | Complementary | 0 (0)            | -            | -               | -                     | -                     | -            | -                     | -                     |
|           | Ingredient    | 0 (0)            | -            | -               | -                     | -                     | -            | -                     | -                     |
|           | Complete      | 100 (5)          | <41.0–81.3   | 32.7 ± 27.2     | <41.0                 | <41.0                 | <41.0        | <41.0                 | 57.0                  |
| ERG       | Complementary | 0 (0)            | -            | -               | -                     | -                     | -            | -                     | -                     |
|           | Ingredient    | 0 (0)            | -            | -               | -                     | -                     | -            | -                     | -                     |
|           | Complete      | 71 (15)          | 12.5–2055.3  | 217.1 ± 514.7   | 19.7                  | 40.0                  | 58.5         | 121.8                 | 267.4                 |
| FUSX      | Complementary | 24 (5)           | 11.0–203.4   | 75.4 ± 74.6     | 22.1                  | 38.9                  | 59.5         | 64.3                  | 147.8                 |
|           | Ingredient    | 5 (1)            | 51.3         | 51.3            | 51.3                  | 51.3                  | 51.3         | 51.3                  | 51.3                  |
|           | Complete      | 0 (0)            | -            | -               | -                     | -                     | -            | -                     | -                     |
| HT2       | Complementary | 67 (2)           | <56.0        | <56.0           | <56.0                 | <56.0                 | <56.0        | <56.0                 | <56.0                 |
|           | Ingredient    | 33 (1)           | <56.0        | <56.0           | <56.0                 | <56.0                 | <56.0        | <56.0                 | <56.0                 |
|           | Complete      | 77 (10)          | <41.6–411.8  | 63.5 ± 122.9    | <41.6                 | <41.6                 | <41.6        | <41.6                 | 92.6                  |
| NEO       | Complementary | 8 (1)            | <41.6        | 20.8            | <41.6                 | <41.6                 | <41.6        | <41.6                 | <41.6                 |
|           | Ingredient    | 15 (2)           | <41.6–112.3  | 20.8 ± 112.3    | 30.0                  | 43.7                  | 66.6         | 66.6                  | 89.4                  |
|           | Complete      | 75 (3)           | <177.7       | <177.7          | <177.7                | <177.7                | <177.7       | <177.7                | <177.7                |
| NIV       | Complementary | 0 (0)            | -            | -               | -                     | -                     | -            | -                     | -                     |
|           | Ingredient    | 25 (1)           | <177.7       | <177.7          | <177.7                | <177.7                | <177.7       | <177.7                | <177.7                |
|           | Complete      | 0 (0)            | -            | -               | -                     | -                     | -            | -                     | -                     |
| AOH       | Complementary | 56 (5)           | <40.3–69.8   | 48.6 ± 26.0     | <40.3                 | <40.3                 | 64.4         | 68.4                  | 69.2                  |
|           | Ingredient    | 44 (4)           | <40.3–76.0   | 20.2 ± 76.0     | 34.0                  | 54.8                  | 68.8         | 68.8                  | 72.5                  |
|           | Complete      | 67 (20)          | <36.2–43.3   | 19.4 ± 5.6      | <36.2                 | <36.2                 | <36.2        | <36.2                 | <36.2                 |
| AME       | Complementary | 23 (7)           | <36.2        | <36.2           | <36.2                 | <36.2                 | <36.2        | <36.2                 | <36.2                 |
|           | Ingredient    | 10 (3)           | <36.2        | <36.2           | <36.2                 | <36.2                 | <36.2        | <36.2                 | <36.2                 |
|           | Complete      | 100 (1)          | 94.5         | 94.5            | 94.5                  | 94.5                  | 94.5         | 94.5                  | 94.5                  |
| ENNA      | Complementary | 0 (0)            | -            | -               | -                     | -                     | -            | -                     | -                     |
|           | Ingredient    | 0 (0)            | -            | -               | -                     | -                     | -            | -                     | -                     |
|           | Complete      | 67 (2)           | <26.1        | <26.1           | <26.1                 | <26.1                 | <26.1        | <26.1                 | <26.1                 |
| ENNA1     | Complementary | 33 (1)           | <26.1        | <26.1           | <26.1                 | <26.1                 | <26.1        | <26.1                 | <26.1                 |
|           | Ingredient    | 0 (0)            | -            | -               | -                     | -                     | -            | -                     | -                     |
|           | Complete      | 40 (2)           | <13.5        | <13.5           | <13.5                 | <13.5                 | <13.5        | <13.5                 | <13.5                 |
| ENNB      | Complementary | 20 (1)           | 23.8         | 23.8            | 23.8                  | 23.8                  | 23.8         | 23.8                  | 23.8                  |
|           | Ingredient    | 40 (2)           | <13.5–14.7   | 6.8 ± 14.7      | 7.5                   | 8.7                   | 10.7         | 10.7                  | 12.7                  |
|           | Complete      | 61 (43)          | <38.8–136.3  | 49.5 ± 40.2     | <38.8                 | <38.8                 | <38.8        | 72.2                  | 121.9                 |
|           | Complementary | 25 (18)          | <38.8–150.0  | 31.7 ± 31.7     | <38.8                 | <38.8                 | <38.8        | <38.8                 | 52.0                  |

| Mycotoxin | Feed Type     | Prevalence<br>% (x) | Range<br>µg/kg | Mean ± SD<br>µg/kg | 10th Percentile<br>µg/kg | 25th<br>Percentile<br>µg/kg | Median<br>µg/kg | 75th<br>Percentile<br>µg/kg | 90th<br>Percentile<br>µg/kg |
|-----------|---------------|---------------------|----------------|--------------------|--------------------------|-----------------------------|-----------------|-----------------------------|-----------------------------|
| ENNB1     | Ingredient    | 14 (10)             | <38.8–53.2     | 19.4 ± 53.2        | <38.8                    | <38.8                       | <38.8           | <38.8                       | 36.1                        |
|           | Complete      | 44 (16)             | <12.9–43.5     | 25.2 ± 10.0        | 12.3                     | 19.1                        | 26.6            | 30.8                        | 35.7                        |
|           | Complementary | 39 (14)             | 14.4–37.7      | 21.1 ± 7.6         | 15.6                     | 16.1                        | 17.9            | 23.4                        | 33.7                        |
| ENN       | Ingredient    | 17 (6)              | 14.6–26.7      | 14.6 ± 26.7        | 14.8                     | 16.9                        | 23.2            | 23.2                        | 24.9                        |
|           | Complete      | 61 (43)             | 19.4–173.8     | 59.8 ± 47.8        | 19.4                     | 19.4                        | 42.3            | 88.3                        | 132.3                       |
|           | Complementary | 25 (18)             | 19.4–186.7     | 50.2 ± 43.0        | 19.4                     | 34.1                        | 35.9            | 39.2                        | 93.1                        |
| CUL       | Ingredient    | 14 (10)             | 19.4–94.6      | 19.4 ± 94.6        | 19.4                     | 19.4                        | 34.2            | 34.2                        | 60.7                        |
|           | Complete      | 8 (1)               | 141.6          | 141.6              | 141.6                    | 141.6                       | 141.6           | 141.6                       | 141.6                       |
|           | Complementary | 46 (6)              | <42.3–187.1    | 121.5 ± 65.9       | 52.6                     | 87.0                        | 125.7           | 178                         | 186.3                       |
| BEA       | Ingredient    | 46 (6)              | 56.1–288.7     | 56.1 ± 288.7       | 65.7                     | 84.9                        | 132.5           | 132.5                       | 205.4                       |
|           | Complete      | 41 (15)             | <15.9–841.8    | 77.0 ± 212.8       | <15.9                    | <15.9                       | <15.9*          | 39.9                        | 71.3                        |
|           | Complementary | 41 (15)             | <15.9–296.7    | 94.0 ± 94.2        | 13.5                     | 23.3                        | 42.5            | 131                         | 237.5                       |
| STC       | Ingredient    | 19 (7)              | <15.9–219.5    | 8.0 ± 219.5        | 22.0                     | 32.9                        | 69.2            | 69.2                        | 98.3                        |
|           | Complete      | 43 (3)              | <30.5–162.5    | 64.3 ± 85.0        | <30.5                    | <30.5                       | <30.5           | 88.9                        | 133.1                       |
|           | Complementary | 57 (4)              | <30.5–3517.1   | 986.5 ± 1696.7     | <30.5                    | <30.5                       | 206.8           | 1178                        | 2581.5                      |
| MON       | Ingredient    | 0 (0)               | -              | -                  | -                        | -                           | -               | -                           | -                           |
|           | Complete      | 13 (1)              | 2583.4         | 2583.4             | 2583.4                   | 2583.4                      | 2583.4          | 2583.4                      | 2583.4                      |
|           | Complementary | 63 (5)              | 109.5–1181.1   | 497.1 ± 429.1      | 168.7                    | 257.6                       | 296.2           | 641.3                       | 965.2                       |
|           | Ingredient    | 25 (2)              | 419.4–1225.9   | 419.4 ± 1225.9     | 500.1                    | 621.0                       | 822.7           | 822.7                       | 1024.3                      |

Key: µg/kg, micrograms per kilogram; %, per cent; x, number of positive samples; AFB1, aflatoxin B1; AFG1, aflatoxin G1; AF, total aflatoxins; DON, deoxynivalenol; DON3G, deoxynivalenol-3-glucoside; ZEN, zearalenone; αZEL, alpha zearalenol; βZEL, beta zearalenol; FUMB1, fumonisin B1; FUMB2, fumonisin B2; FUMB, total fumonisins B; ECO, ergocornine; ECR, ergocristine; ENV, ergonovine; ESN, ergosine; ETA, ergotamine; αECP, alpha ergocryptine; ERG, total ergot alkaloids; FUSX, fusarenon X; HT2, HT-2 toxin; NEO, neosolaniol; NIV, nivalenol; AOH, alternariol; AME, alternariol methyl ether; ENNA, enniatin A; ENNA1, enniatin A1; ENNB, enniatin B; ENNB1, enniatin B1; ENN, total enniatins; CUL, 15 hydroxy-culmorin; BEA, beauvericin; STC, sterigmatocystin; MON, moniliformin; \*,  $p \leq 0.05$ .



| Mycotoxin | Fish Type     | Prevalence<br>% (x) | Range<br>µg/kg | Mean ± SD<br>µg/kg | 10th Percentile<br>µg/kg | 25th Percentile<br>µg/kg | Median<br>µg/kg | 75th Percentile<br>µg/kg | 90th Percentile<br>µg/kg |
|-----------|---------------|---------------------|----------------|--------------------|--------------------------|--------------------------|-----------------|--------------------------|--------------------------|
| HT2       | Rainbow trout | 31 (4)              | <41.6–411.8    | 118.6 ± 195.5      | <41.6                    | <41.6                    | <41.6           | 118.6                    | 294.5                    |
|           | Tilapia       | 69 (9)              | <41.6–112.3    | 35.0 ± 31.4        | <41.6                    | <41.6                    | <41.6           | <41.6                    | 68.1                     |
| NEO       | Rainbow trout | 50 (2)              | <177.7         | <177.7             | <177.7                   | <177.7                   | <177.7          | <177.7                   | <177.7                   |
|           | Tilapia       | 50 (2)              | <177.7         | <177.7             | <177.7                   | <177.7                   | <177.7          | <177.7                   | <177.7                   |
| NIV       | Rainbow trout | 0 (0)               | -              | -                  | -                        | -                        | -               | -                        | -                        |
|           | Tilapia       | 100 (9)             | <40.3–76       | 53.0 ± 24.8        | <40.3                    | <40.3                    | 66.3            | 69.8                     | 72.2                     |
| AOH       | Rainbow trout | 3 (1)               | <36.2          | <36.2              | <36.2                    | <36.2                    | <36.2           | <36.2                    | <36.2                    |
|           | Tilapia       | 97 (29)             | <36.2–43.3     | 19.0 ± 4.7         | <36.2                    | <36.2                    | <36.2           | <36.2                    | <36.2                    |
| AME       | Rainbow trout | 0 (0)               | -              | -                  | -                        | -                        | -               | -                        | -                        |
|           | Tilapia       | 100 (1)             | 94.5           | 94.5               | 94.5                     | 94.5                     | 94.5            | 94.5                     | 94.5                     |
| ENNA      | Rainbow trout | 0 (0)               | -              | -                  | -                        | -                        | -               | -                        | -                        |
|           | Tilapia       | 100 (3)             | <26.1          | <26.1              | <26.1                    | <26.1                    | <26.1           | <26.1                    | <26.1                    |
| ENNA1     | Rainbow trout | 0 (0)               | -              | -                  | -                        | -                        | -               | -                        | -                        |
|           | Tilapia       | 100 (5)             | <13.5–23.8     | 11.8 ± 7.6         | <13.5                    | <13.5                    | <13.5           | 14.7                     | 20.2                     |
| ENNB      | Rainbow trout | 23 (16)             | <38.8–81.4     | 31.5 ± 20.5        | <38.8                    | <38.8                    | <38.8           | 40.6                     | 63.4                     |
|           | Tilapia       | 77 (55)             | <38.8–150.0    | 44.9 ± 39.6        | <38.8                    | <38.8                    | <38.8           | 57.5                     | 121.9                    |
| ENNB1     | Rainbow trout | 11 (4)              | 18.7–33.9      | 24.5 ± 7.1         | 18.9                     | 19.1                     | 22.8            | 28.2                     | 31.6                     |
|           | Tilapia       | 89 (32)             | <12.9–43.5     | 22.8 ± 8.8         | 14.6                     | 16.3                     | 23.2            | 27                       | 36.4                     |
| ENN       | Rainbow trout | 23 (16)             | 19.4–115.3     | 37.6 ± 26.9        | 19.4                     | 19.4                     | 19.4            | 49                       | 63.4                     |
|           | Tilapia       | 77 (55)             | 19.4–186.7     | 59.9 ± 47.1        | 19.4                     | 19.4                     | 37.6            | 82.5                     | 132.1                    |
| CUL       | Rainbow trout | 0 (0)               | -              | -                  | -                        | -                        | -               | -                        | -                        |
|           | Tilapia       | 100 (13)            | <42.3–288.7    | 136.9 ± 73.5       | 59.9                     | 84.1                     | 141.6           | 185.4                    | 216.1                    |
| BEA       | Rainbow trout | 11 (4)              | <15.9–19.8     | 10.9 ± 5.9         | <15.9                    | <15.9                    | <15.9           | 10.9                     | 16.2                     |
|           | Tilapia       | 89 (33)             | <15.9–841.8    | 93.3 ± 154.8       | <15.9                    | 16                       | 37.3*           | 112.5                    | 218.6                    |
| STC       | Rainbow trout | 0 (0)               | -              | -                  | -                        | -                        | -               | -                        | -                        |
|           | Tilapia       | 100 (7)             | <30.5–3517.1   | 591.3 ± 1298.0     | <30.5                    | <30.5                    | <30.5           | 280.4                    | 1645.8                   |
| MON       | Rainbow trout | 0 (0)               | -              | -                  | -                        | -                        | -               | -                        | -                        |
|           | Tilapia       | 100 (8)             | <218.9–2583.4  | 839.3 ± 818.5      | 213.2                    | 286.6                    | 530.4           | 1192.3                   | 1633.2                   |

**Key:** µg/kg, micrograms per kilogram; %, per cent; x, number of positive samples; AFB1, aflatoxin B1; AFG1, aflatoxin G1; AF, total aflatoxins; DON, deoxynivalenol; DON3G, deoxynivalenol-3-glucoside; ZEN, zearalenone; αZEL, alpha zearalenol; βZEL, beta zearalenol; FUMB1, fumonisin B1; FUMB2, fumonisin B2; FUMB, total fumonisins B; ECO, ergocornine; ECR, ergocristine; ENV, ergonovine; ESN, ergosine; ETA, ergotamine; αECP, alpha ergocryptine; ERG, total ergot alkaloids; FUSX, fusarenon X; HT2, HT-2 toxin; NEO, neosolaniol; NIV, nivalenol; AOH, alternariol; AME, alternariol methyl ether; ENNA, enniatin A; ENNA1, enniatin A1; ENNB, enniatin B; ENNB1, enniatin B1; ENN, total enniatins; CUL, 15 hydroxy-culmorin; BEA, beauvericin; STC, sterigmatocystin; MON, moniliformin; \*,  $p \leq 0.05$ .

**Table S3.** Mycotoxins prevalence and levels in fish feeds samples from fish farmers and feed manufacturers.

| Mycotoxin | Feed source       | Prevalence<br>% (x) | Range<br>µg/kg | Mean ± SD<br>µg/kg | 10th Percentile<br>µg/kg | 25th Percentile<br>µg/kg | Median<br>µg/kg | 75th Percentile<br>µg/kg | 90th Percentile<br>µg/kg |
|-----------|-------------------|---------------------|----------------|--------------------|--------------------------|--------------------------|-----------------|--------------------------|--------------------------|
| AFB1      | Fish farmer       | 87 (20)             | <14.7–22.8     | 9.5 ± 4.6          | <14.7                    | <14.7                    | <14.7           | <14.7                    | 16.7                     |
|           | Feed Manufacturer | 13 (3)              | <14.7–43.6     | 19.4 ± 20.9        | <14.7                    | <14.7                    | <14.7           | 25.5                     | 36.4                     |
| AFG1      | Fish farmer       | 100 (1)             | <155.8         | <155.8             | <155.8                   | <155.8                   | <155.8          | <155.8                   | <155.8                   |
|           | Feed Manufacturer | 0 (0)               | -              | -                  | -                        | -                        | -               | -                        | -                        |
| AF        | Fish farmer       | 87 (20)             | <14.7–93.6     | 13.4 ± 19.4        | <14.7                    | <14.7                    | <14.7           | <14.7                    | 17.9                     |
|           | Feed Manufacturer | 13 (3)              | <14.7–43.6     | 19.4 ± 20.9        | <14.7                    | <14.7                    | <14.7           | 25.5                     | 36.4                     |
| DON       | Fish farmer       | 81 (48)             | <40.4–819.9    | 203.0 ± 209.8      | <40.4                    | <40.4                    | 122.9           | 350.7                    | 464.1                    |
|           | Feed Manufacturer | 19 (11)             | <40.4          | <40.4              | <40.4                    | <40.4                    | <40.4*          | <40.4                    | <40.4                    |
| DON3G     | Fish farmer       | 100 (20)            | <46.8–97.5     | 31.7 ± 20.9        | <46.8                    | <46.8                    | <46.8           | <46.8                    | 66                       |
|           | Feed Manufacturer | 0 (0)               | -              | -                  | -                        | -                        | -               | -                        | -                        |
| ZEN       | Fish farmer       | 90 (28)             | <38.0–757.9    | 148.5 ± 175.2      | <38.0                    | <38.0                    | 74.5            | 200.2                    | 384.4                    |
|           | Feed Manufacturer | 10 (3)              | <38.0          | <38.0              | <38.0                    | <38.0                    | <38.0           | <38.0                    | <38.0                    |
| αZEL      | Fish farmer       | 100 (19)            | <22.2–288.4    | 61.6 ± 76.1        | <22.2                    | <22.2                    | 26.7            | 79.4                     | 161.6                    |
|           | Feed Manufacturer | 0 (0)               | -              | -                  | -                        | -                        | -               | -                        | -                        |
| βZEL      | Fish farmer       | 81 (21)             | <16.0–79.8     | 32.1 ± 23.1        | <16.0                    | <16.0                    | 29.8            | 46.6                     | 64.9                     |
|           | Feed Manufacturer | 19 (5)              | <16.0–64.5     | 28.1 ± 27.8        | <16.0                    | <16.0                    | <16.0           | 51.8                     | 59.4                     |
| FUMB1     | Fish farmer       | 88 (37)             | <63.0–1427.4   | 270.3 ± 346.1      | <63.0                    | <63.0                    | 134.4           | 315                      | 703.3                    |
|           | Feed Manufacturer | 12 (5)              | <63.0–274.4    | 80.1 ± 108.6       | <63.0                    | <63.0                    | <63.0           | <63.0                    | 177.2                    |
| FUMB2     | Fish farmer       | 96 (22)             | <68.9–649.2    | 123.9 ± 161.0      | <68.9                    | <68.9                    | <68.9           | 157.5                    | 231.7                    |
|           | Feed Manufacturer | 4 (1)               | <68.9          | <68.9              | <68.9                    | <68.9                    | <68.9           | <68.9                    | <68.9                    |
| FUMB      | Fish farmer       | 88 (37)             | <63.0–2076.6   | 343.9 ± 475.3      | <63.0                    | <63.0                    | 188.9           | 349.5                    | 897.5                    |
|           | Feed Manufacturer | 12 (5)              | <63.0–308.9    | 87.0 ± 124.0       | <63.0                    | <63.0                    | <63.0           | <63.0                    | 197.9                    |
| ECO       | Fish farmer       | 91 (10)             | 37.6–64.3      | 48.0 ± 10.1        | 38.7                     | 39.2                     | 45.3            | 57.2                     | 60                       |
|           | Feed Manufacturer | 9 (1)               | 42.3           | 42.3               | 42.3                     | 42.3                     | 42.3            | 42.3                     | 42.3                     |
| ECR       | Fish farmer       | 100 (1)             | <24.9          | <24.9              | <24.9                    | <24.9                    | <24.9           | <24.9                    | <24.9                    |
|           | Feed Manufacturer | 0 (0)               | -              | -                  | -                        | -                        | -               | -                        | -                        |
| ENV       | Fish farmer       | 67 (2)              | <21.9          | <21.9              | <21.9                    | <21.9                    | <21.9           | <21.9                    | <21.9                    |
|           | Feed Manufacturer | 33 (1)              | <21.9          | <21.9              | <21.9                    | <21.9                    | <21.9           | <21.9                    | <21.9                    |
| ESN       | Fish farmer       | 60 (3)              | <38.4–144.2    | 67.3 ± 67.3        | 23.1                     | 28.9                     | 38.5            | 91.4                     | 123.1                    |
|           | Feed Manufacturer | 40 (2)              | <38.4          | <38.4              | <38.4                    | <38.4                    | <38.4           | <38.4                    | <38.4                    |
| ETA       | Fish farmer       | 67 (6)              | <29.3–1895.6   | 392.4 ± 738.4      | 36.6                     | 65.7                     | 109.5           | 157.9                    | 1031.1                   |
|           | Feed Manufacturer | 33 (3)              | 32.4–257.5     | 119.8 ± 120.7      | 39.8                     | 50.9                     | 69.4            | 163.5                    | 219.9                    |
| αECP      | Fish farmer       | 40 (2)              | <41–81.3       | 50.9 ± 43.0        | 26.6                     | 35.7                     | 50.9            | 66.1                     | 75.2                     |
|           | Feed Manufacturer | 60 (3)              | <41.0          | <41.0              | <41.0                    | <41.0                    | <41.0           | <41.0                    | <41.0                    |
| ERG       | Fish farmer       | 76 (16)             | 11.0–2055.3    | 198.3 ± 498.6      | 25.6                     | 40.6                     | 59              | 98.4                     | 204.9                    |
|           | Feed Manufacturer | 24 (5)              | 19.2–308.2     | 102.5 ± 120.9      | 19.7                     | 20.5                     | 52.9            | 111.7                    | 229.6                    |
| FUSX      | Fish farmer       | 100 (3)             | <56.0          | <56.0              | <56.0                    | <56.0                    | <56.0           | <56.0                    | <56.0                    |
|           | Feed Manufacturer | 0 (0)               | -              | -                  | -                        | -                        | -               | -                        | -                        |

| Mycotoxin | Feed source       | Prevalence<br>% (x) | Range<br>µg/kg | Mean ± SD<br>µg/kg | 10th Percentile<br>µg/kg | 25th Percentile<br>µg/kg | Median<br>µg/kg | 75th Percentile<br>µg/kg | 90th Percentile<br>µg/kg |
|-----------|-------------------|---------------------|----------------|--------------------|--------------------------|--------------------------|-----------------|--------------------------|--------------------------|
| HT2       | Fish farmer       | 77 (10)             | <41.6–112.3    | 33.6 ± 29.9        | <41.6                    | <41.6                    | <41.6           | <41.6                    | 62.6                     |
|           | Feed Manufacturer | 23 (3)              | <41.6–411.8    | 151.1 ± 225.7      | <41.6                    | <41.6                    | <41.6           | 216.3                    | 333.6                    |
| NEO       | Fish farmer       | 50 (2)              | <177.7         | <177.7             | <177.7                   | <177.7                   | <177.7          | <177.7                   | <177.7                   |
|           | Feed Manufacturer | 50 (2)              | <177.7         | <177.7             | <177.7                   | <177.7                   | <177.7          | <177.7                   | <177.7                   |
| NIV       | Fish farmer       | 100 (9)             | <40.3–76.0     | 53.0 ± 24.8        | <40.3                    | <40.3                    | 66.3            | 69.8                     | 72.2                     |
|           | Feed Manufacturer | 0 (0)               | -              | -                  | -                        | -                        | -               | -                        | -                        |
| AOH       | Fish farmer       | 87 (26)             | <36.2–43.3     | 19.1 ± 4.9         | <36.2                    | <36.2                    | <36.2           | <36.2                    | <36.2                    |
|           | Feed Manufacturer | 13 (4)              | <36.2          | <36.2              | <36.2                    | <36.2                    | <36.2           | <36.2                    | <36.2                    |
| AME       | Fish farmer       | 100 (1)             | 94.5           | 94.5               | 94.5                     | 94.5                     | 94.5            | 94.5                     | 94.5                     |
|           | Feed Manufacturer | 0 (0)               | -              | -                  | -                        | -                        | -               | -                        | -                        |
| ENNA      | Fish farmer       | 100 (3)             | <26.1          | <26.1              | <26.1                    | <26.1                    | <26.1           | <26.1                    | <26.1                    |
|           | Feed Manufacturer | 0 (0)               | -              | -                  | -                        | -                        | -               | -                        | -                        |
| ENNA1     | Fish farmer       | 80 (4)              | <13.5–23.8     | 13.0 ± 8.1         | <13.5                    | <13.5                    | 10.7            | 17.0                     | 21.1                     |
|           | Feed Manufacturer | 20 (1)              | <13.5          | <13.5              | <13.5                    | <13.5                    | <13.5           | <13.5                    | <13.5                    |
| ENNB      | Fish farmer       | 76 (54)             | <38.8–150.0    | 43.5 ± 38.1        | <38.8                    | <38.8                    | <38.8           | 56.3                     | 121.9                    |
|           | Feed Manufacturer | 24 (17)             | 6.8            | 6.8                | 6.8                      | 6.8                      | 6.8             | 6.8                      | 6.8                      |
| ENNB1     | Fish farmer       | 89 (32)             | <12.9–43.5     | 23.1 ± 8.5         | 15.0                     | 16.6                     | 21.4            | 27.2                     | 36.4                     |
|           | Feed Manufacturer | 11 (4)              | 19.4–118.4     | 36.7 ± 30.9        | 19.4                     | 19.4                     | 19.4            | 42.3                     | 82.3                     |
| ENN       | Fish farmer       | 76 (54)             | 19.4–186.7     | 58.9 ± 47.5        | 19.4                     | 19.4                     | 37.2            | 80.2                     | 132.8                    |
|           | Feed Manufacturer | 24 (17)             | <12.9–27.4     | 21.7 ± 10.2        | 12.4                     | 21.3                     | 26.6            | 27.0                     | 27.2                     |
| CUL       | Fish farmer       | 100 (13)            | <42.3–288.7    | 136.9 ± 73.5       | 59.9                     | 84.1                     | 141.6           | 185.4                    | 216.1                    |
|           | Feed Manufacturer | 0 (0)               | 19.4–118.4     | 42.2 ± 29.5        | 19.4                     | 19.4                     | 32.6            | 46.8                     | 82.3                     |
| BEA       | Fish farmer       | 81 (30)             | <15.9–841.8    | 99.8 ± 161.0       | <15.9                    | 20.3                     | 36.5            | 120.2                    | 222.8                    |
|           | Feed Manufacturer | 19 (7)              | <15.9          | <15.9              | <15.9                    | <15.9                    | <15.9*          | <15.9                    | <15.9                    |
| STC       | Fish farmer       | 86 (6)              | <30.5–3517.1   | 662.7 ± 1406.7     | <30.5                    | <30.5                    | <30.5           | 302.5                    | 1957.7                   |
|           | Feed Manufacturer | 14 (1)              | 8.0–46.5       | 18.4 ± 17.8        | 8.0                      | 8.0                      | 8.0             | 25.2                     | 44.0                     |
| MON       | Fish farmer       | 100 (8)             | <218.9–2583.4  | 839.3 ± 818.5      | 213.2                    | 286.6                    | 530.4           | 1192.3                   | 1633.2                   |
|           | Feed Manufacturer | 0 (0)               | 162.5          | 162.5              | 162.5                    | 162.5                    | 162.5           | 162.5                    | 162.5                    |

Key: µg/kg, micrograms per kilogram; %, per cent; x, number of positive samples; AFB1, aflatoxin B1; AFG1, aflatoxin G1; AF, total aflatoxins; DON, deoxynivalenol; DON3G, deoxynivalenol-3-glucoside; ZEN, zearalenone; αZEL, alpha zearalenol; βZEL, beta zearalenol; FUMB1, fumonisin B1; FUMB2, fumonisin B2; FUMB, total fumonisins B; ECO, ergocornine; ECR, ergocristine; ENV, ergonovine; ESN, ergosine; ETA, ergotamine; αECP, alpha ergocryptine; ERG, total ergot alkaloids; FUSX, fusarenon X; HT2, HT-2 toxin; NEO, neosolaniol; NIV, nivalenol; AOH, alternariol; AME, alternariol methyl ether; ENNA, enniatin A; ENNA1, enniatin A1; ENNB, enniatin B; ENNB1, enniatin B1; ENN, total enniatins; CUL, 15 hydroxy-culmorin; BEA, beauvericin; STC, sterigmatocystin; MON, moniliformin; \*,  $p \leq 0.05$ .





| Mycotoxin | Feed preparation | Prevalence<br>% (x) | Range<br>µg/kg | Mean ± SD<br>µg/kg | 10th Percentile<br>µg/kg | 25th Percentile<br>µg/kg | Median<br>µg/kg | 75th Percentile<br>µg/kg | 90th Percentile<br>µg/kg |
|-----------|------------------|---------------------|----------------|--------------------|--------------------------|--------------------------|-----------------|--------------------------|--------------------------|
| HT2       | Commercial       | 85 (11)             | <41.6–411.8    | 64.7 ± 118.4       | <41.6                    | <41.6                    | <41.6           | <41.6                    | 112.3                    |
|           | Homemade         | 15 (2)              | <41.6–57.1     | 39.0 ± 25.7        | 24.4                     | 29.9                     | 39.0            | 48.0                     | 53.5                     |
| NEO       | Commercial       | 75 (3)              | <177.7         | <177.7             | <177.7                   | <177.7                   | <177.7          | <177.7                   | <177.7                   |
|           | Homemade         | 25 (1)              | <177.7         | <177.7             | <177.7                   | <177.7                   | <177.7          | <177.7                   | <177.7                   |
| NIV       | Commercial       | 56 (5)              | <40.3–76       | 60.7 ± 22.9        | 38.6                     | 66.3                     | 69.8            | 71.3                     | 74.1                     |
|           | Homemade         | 44 (4)              | <40.3–68.4     | 43.3 ± 26.8        | <40.3                    | <40.3                    | 42.3            | 65.4                     | 67.2                     |
| AOH       | Commercial       | 67 (20)             | <36.2–43.3     | 19.4 ± 5.6         | <36.2                    | <36.2                    | <36.2           | <36.2                    | <36.2                    |
|           | Homemade         | 33 (10)             | <36.2          | <36.2              | <36.2                    | <36.2                    | <36.2           | <36.2                    | <36.2                    |
| AME       | Commercial       | 100 (1)             | 94.5           | 94.5               | 94.5                     | 94.5                     | 94.5            | 94.5                     | 94.5                     |
|           | Homemade         | 0 (0)               | -              | -                  | -                        | -                        | -               | -                        | -                        |
| ENNA      | Commercial       | 67 (2)              | <26.1          | <26.1              | <26.1                    | <26.1                    | <26.1           | <26.1                    | <26.1                    |
|           | Homemade         | 33 (1)              | <26.1          | <26.1              | <26.1                    | <26.1                    | <26.1           | <26.1                    | <26.1                    |
| ENNA1     | Commercial       | 60 (3)              | <13.5–14.7     | 9.4 ± 4.6          | <13.5                    | <13.5                    | <13.5           | 10.7                     | 13.1                     |
|           | Homemade         | 40 (2)              | <13.5–23.8     | 15.3 ± 12.1        | 8.5                      | 11.0                     | 15.3            | 19.5                     | 22.1                     |
| ENNB      | Commercial       | 69 (49)             | <38.8–136.3    | 43.0 ± 34.7        | <38.8                    | <38.8                    | <38.8           | 61.3                     | 90.3                     |
|           | Homemade         | 31 (22)             | <38.8–150.0    | 39.4 ± 40.9        | <38.8                    | <38.8                    | <38.8           | 37.8                     | 119.5                    |
| ENNB1     | Commercial       | 56 (20)             | <12.9–37.5     | 23.2 ± 7.2         | 14.9                     | 18.6                     | 23.6            | 27.0                     | 30.3                     |
|           | Homemade         | 44 (16)             | <12.9–43.5     | 22.7 ± 10.2        | 15.2                     | 16.3                     | 19.0            | 28.5                     | 37.2                     |
| ENN       | Commercial       | 69 (49)             | 19.4–173.8     | 53.5 ± 40.0        | 19.4                     | 19.4                     | 38.6            | 80.8                     | 115.9                    |
|           | Homemade         | 31 (22)             | 19.4–186.7     | 57.9 ± 53.3        | 19.4                     | 22.7                     | 35.9            | 61.1                     | 161.1                    |
| CUL       | Commercial       | 54 (7)              | 56.1–288.7     | 150.0 ± 82.1       | 67.6                     | 94.4                     | 141.6           | 187.5                    | 249.5                    |
|           | Homemade         | 46 (6)              | <42.3–187.1    | 121.5 ± 65.9       | 52.6                     | 87.0                     | 125.7           | 178.0                    | 186.3                    |
| BEA       | Commercial       | 57 (21)             | <15.9–841.8    | 87.3 ± 184.0       | <15.9                    | <15.9                    | 31.4            | 69.2                     | 214.8                    |
|           | Homemade         | 43 (16)             | <15.9–296.7    | 80.7 ± 87.3        | <15.9                    | 22.0                     | 39.1            | 115.5                    | 195.2                    |
| STC       | Commercial       | 29 (2)              | <30.5          | <30.5              | <30.5                    | <30.5                    | <30.5           | <30.5                    | <30.5                    |
|           | Homemade         | 71 (5)              | <30.5–3517.1   | 821.7 ± 1514.9     | <30.5                    | <30.5                    | 162.5           | 398.3                    | 2269.6                   |
| MON       | Commercial       | 50 (4)              | 419.4–2583.4   | 1217.5 ± 972.1     | 486.0                    | 585.8                    | 933.6           | 1565.3                   | 2176.2                   |
|           | Homemade         | 50 (4)              | <218.9–1181.1  | 461.1 ± 486.7      | 153.9                    | 220.6                    | 276.9           | 517.4                    | 915.6                    |

Key: µg/kg, micrograms per kilogram; %, per cent; x, number of positive samples; AFB1, aflatoxin B1; AFG1, aflatoxin G1; AF, total aflatoxins; DON, deoxynivalenol; DON3G, deoxynivalenol-3-glucoside; ZEN, zearalenone; αZEL, alpha zearalenol; βZEL, beta zearalenol; FUMB1, fumonisin B1; FUMB2, fumonisin B2; FUMB, total fumonisins B; ECO, ergocornine; ECR, ergocristine; ENV, ergonovine; ESN, ergosine; ETA, ergotamine; αECP, alpha ergocryptine; ERG, total ergot alkaloids; FUSX, fusarenon X; HT2, HT-2 toxin; NEO, neosolaniol; NIV, nivalenol; AOH, alternariol; AME, alternariol methyl ether; ENNA, enniatin A; ENNA1, enniatin A1; ENNB, enniatin B; ENNB1, enniatin B1; ENN, total enniatins; CUL, 15 hydroxy-culmorin; BEA, beauvericin; STC, sterigmatocystin; MON, moniliformin; \*,  $p \leq 0.05$ .

**Table S5.** Prevalence of mycotoxins in fish feed samples containing particular ingredients.

| Mycotoxin   | Maize Bran | Wheat Bran | Dried Silver Cyprinid Fish | Fishmeal | Pollard | Freshwater Shrimp | Cotton Seed Cake | Sun Flower Seed Cake | Soya Bean Cake | Maize Germ | Canola Seed Cake | Cassava | Multi Vitamins | Bone Meal | Rice Bran | Dairy Meal | Wheat  | Poultry Waste | Rice   |
|-------------|------------|------------|----------------------------|----------|---------|-------------------|------------------|----------------------|----------------|------------|------------------|---------|----------------|-----------|-----------|------------|--------|---------------|--------|
|             | % (x)      | % (x)      | % (x)                      | % (x)    | % (x)   | % (x)             | % (x)            | % (x)                | % (x)          | % (x)      | % (x)            | % (x)   | % (x)          | % (x)     | % (x)     | % (x)      | % (x)  | % (x)         | % (x)  |
| All Samples | 53 (41)    | 47 (37)    | 35 (27)                    | 35 (27)  | 32 (25) | 28 (22)           | 27 (21)          | 27 (21)              | 26 (20)        | 14 (11)    | 8 (6)            | 8 (6)   | 6 (5)          | 5 (4)     | 4 (3)     | 2 (2)      | 3 (2)  | 3 (2)         | 1 (1)  |
| AFB1        | 57 (13)    | 43 (10)    | 26 (6)                     | 35 (8)   | 13 (3)  | 13 (3)            | 30 (7)           | 30 (7)               | 30 (7)         | 0 (0)      | 0 (0)            | 9 (2)   | 13 (3)         | 13 (3)    | 0 (0)     | 9 (2)      | 0 (0)  | 0 (0)         | 0 (0)  |
| AFG1        | 100 (1)    | 0 (0)      | 0 (0)                      | 100 (1)  | 0 (0)   | 0 (0)             | 0 (0)            | 100 (1)              | 100 (1)        | 0 (0)      | 0 (0)            | 0 (0)   | 0 (0)          | 0 (0)     | 0 (0)     | 0 (0)      | 0 (0)  | 0 (0)         | 0 (0)  |
| AF          | 57 (13)    | 43 (10)    | 26 (6)                     | 35 (8)   | 13 (3)  | 13 (3)            | 30 (7)           | 30 (7)               | 30 (7)         | 0 (0)      | 0 (0)            | 9 (2)   | 13 (3)         | 13 (3)    | 0 (0)     | 0 (0)      | 0 (0)  | 0 (0)         | 0 (0)  |
| DON         | 47 (28)    | 44 (26)    | 27 (16)                    | 29 (17)  | 24 (14) | 19 (11)           | 22 (13)          | 22 (13)              | 20 (12)        | 14 (8)     | 8 (5)            | 2 (1)   | 8 (5)          | 7 (4)     | 5 (3)     | 2 (1)      | 2 (1)  | 0 (0)         | 2 (1)  |
| DON3G       | 45 (9)     | 35 (7)     | 10 (2)                     | 20 (4)   | 15 (3)  | 5 (1)             | 15 (3)           | 15 (3)               | 15 (3)         | 0 (0)      | 0 (0)            | 5 (1)   | 5 (1)          | 5 (1)     | 10 (2)    | 5 (1)      | 0 (0)  | 0 (0)         | 5 (1)  |
| ZEN         | 48 (15)    | 42 (13)    | 19 (6)                     | 23 (7)   | 23 (7)  | 19 (6)            | 19 (6)           | 23 (7)               | 19 (6)         | 0 (0)      | 0 (0)            | 10 (3)  | 6 (2)          | 3 (1)     | 10 (3)    | 3 (1)      | 3 (1)  | 6 (2)         | 3 (1)  |
| αZEL        | 42 (8)     | 42 (8)     | 11 (2)                     | 16 (3)   | 5 (1)   | 5 (1)             | 11 (2)           | 16 (3)               | 11 (2)         | 0 (0)      | 0 (0)            | 0 (0)   | 11 (2)         | 5 (1)     | 5 (1)     | 5 (1)      | 5 (1)  | 5 (1)         | 5 (1)  |
| βZEL        | 50 (13)    | 42 (11)    | 31 (8)                     | 31 (8)   | 19 (5)  | 19 (5)            | 15 (4)           | 19 (5)               | 19 (5)         | 12 (3)     | 0 (0)            | 4 (1)   | 15 (4)         | 12 (3)    | 4 (1)     | 0 (0)      | 0 (0)  | 8 (2)         | 0 (0)  |
| FUMB1       | 50 (21)    | 43 (18)    | 19 (8)                     | 24 (10)  | 17 (7)  | 14 (6)            | 19 (8)           | 19 (8)               | 17 (7)         | 5 (2)      | 2 (1)            | 5 (2)   | 10 (4)         | 7 (3)     | 7 (3)     | 2 (1)      | 2 (1)  | 2 (1)         | 2 (1)  |
| FUMB2       | 52 (12)    | 35 (8)     | 13 (3)                     | 17 (4)   | 9 (2)   | 9 (2)             | 9 (2)            | 13 (3)               | 13 (3)         | 0 (0)      | 0 (0)            | 4 (1)   | 9 (2)          | 4 (1)     | 13 (3)    | 0 (0)      | 0 (0)  | 4 (1)         | 0 (0)  |
| FUMB        | 50 (21)    | 43 (18)    | 19 (8)                     | 24 (10)  | 17 (7)  | 14 (6)            | 19 (8)           | 19 (8)               | 17 (7)         | 5 (2)      | 2 (1)            | 5 (2)   | 10 (4)         | 7 (3)     | 7 (3)     | 2 (1)      | 2 (1)  | 2 (1)         | 2 (1)  |
| ECO         | 45 (5)     | 36 (4)     | 9 (1)                      | 9 (1)    | 9 (1)   | 9 (1)             | 9 (1)            | 18 (2)               | 9 (1)          | 0 (0)      | 0 (0)            | 0 (0)   | 9 (1)          | 9 (1)     | 0 (0)     | 0 (0)      | 0 (0)  | 0 (0)         | 0 (0)  |
| ECR         | 0 (0)      | 0 (0)      | 0 (0)                      | 0 (0)    | 0 (0)   | 0 (0)             | 0 (0)            | 0 (0)                | 0 (0)          | 0 (0)      | 0 (0)            | 0 (0)   | 0 (0)          | 0 (0)     | 0 (0)     | 0 (0)      | 0 (0)  | 0 (0)         | 0 (0)  |
| ENV         | 33 (1)     | 67 (2)     | 33 (1)                     | 33 (1)   | 0 (0)   | 0 (0)             | 33 (1)           | 33 (1)               | 33 (1)         | 0 (0)      | 0 (0)            | 0 (0)   | 33 (1)         | 33 (1)    | 0 (0)     | 0 (0)      | 0 (0)  | 0 (0)         | 0 (0)  |
| ESN         | 40 (2)     | 60 (3)     | 40 (2)                     | 40 (2)   | 20 (1)  | 20 (1)            | 40 (2)           | 40 (2)               | 40 (2)         | 0 (0)      | 0 (0)            | 20 (1)  | 20 (1)         | 20 (1)    | 0 (0)     | 0 (0)      | 0 (0)  | 0 (0)         | 0 (0)  |
| ETA         | 33 (3)     | 33 (3)     | 33 (3)                     | 33 (3)   | 0 (0)   | 0 (0)             | 33 (3)           | 33 (3)               | 33 (3)         | 0 (0)      | 0 (0)            | 0 (0)   | 33 (3)         | 33 (3)    | 0 (0)     | 0 (0)      | 0 (0)  | 0 (0)         | 0 (0)  |
| αECP        | 60 (3)     | 60 (3)     | 60 (3)                     | 60 (3)   | 20 (1)  | 20 (1)            | 60 (3)           | 60 (3)               | 60 (3)         | 20 (1)     | 20 (1)           | 0 (0)   | 40 (2)         | 40 (2)    | 0 (0)     | 0 (0)      | 0 (0)  | 0 (0)         | 0 (0)  |
| ERG         | 43 (9)     | 43 (9)     | 24 (5)                     | 24 (5)   | 14 (3)  | 14 (3)            | 24 (5)           | 29 (6)               | 24 (5)         | 5 (1)      | 5 (1)            | 5 (1)   | 14 (3)         | 14 (3)    | 0 (0)     | 0 (0)      | 0 (0)  | 0 (0)         | 0 (0)  |
| FUSX        | 67 (2)     | 33 (1)     | 33 (1)                     | 33 (1)   | 33 (1)  | 0 (0)             | 33 (1)           | 33 (1)               | 33 (1)         | 0 (0)      | 0 (0)            | 0 (0)   | 33 (1)         | 33 (1)    | 0 (0)     | 0 (0)      | 0 (0)  | 0 (0)         | 0 (0)  |
| HT2         | 54 (7)     | 62 (8)     | 46 (6)                     | 38 (5)   | 38 (5)  | 31 (4)            | 38 (5)           | 38 (5)               | 31 (4)         | 15 (2)     | 8 (1)            | 8 (1)   | 15 (2)         | 15 (2)    | 0 (0)     | 8 (1)      | 0 (0)  | 0 (0)         | 8 (1)  |
| NEO         | 75 (3)     | 75 (3)     | 50 (2)                     | 75 (3)   | 75 (3)  | 50 (2)            | 75 (3)           | 75 (3)               | 75 (3)         | 50 (2)     | 50 (2)           | 0 (0)   | 0 (0)          | 0 (0)     | 0 (0)     | 25 (1)     | 0 (0)  | 0 (0)         | 25 (1) |
| NIV         | 44 (4)     | 44 (4)     | 22 (2)                     | 11 (1)   | 22 (2)  | 0 (0)             | 22 (2)           | 11 (1)               | 11 (1)         | 0 (0)      | 0 (0)            | 0 (0)   | 22 (2)         | 11 (1)    | 11 (1)    | 11 (1)     | 11 (1) | 0 (0)         | 11 (1) |
| AOH         | 40 (12)    | 43 (13)    | 27 (8)                     | 27 (8)   | 13 (4)  | 10 (3)            | 27 (8)           | 27 (8)               | 23 (7)         | 0 (0)      | 0 (0)            | 3 (1)   | 17 (5)         | 13 (4)    | 3 (1)     | 3 (1)      | 0 (0)  | 0 (0)         | 3 (1)  |

|       |         |         |         |         |         |         |         |         |         |         |       |         |        |        |        |       |        |        |       |
|-------|---------|---------|---------|---------|---------|---------|---------|---------|---------|---------|-------|---------|--------|--------|--------|-------|--------|--------|-------|
| AME   | 100 (1) | 100 (1) | 100 (1) | 100 (1) | 100 (1) | 100 (1) | 100 (1) | 100 (1) | 100 (1) | 0 (0)   | 0 (0) | 100 (1) | 0 (0)  | 0 (0)  | 0 (0)  | 0 (0) | 0 (0)  | 0 (0)  | 0 (0) |
| ENNA  | 0 (0)   | 0 (0)   | 0 (0)   | 0 (0)   | 33 (1)  | 0 (0)   | 0 (0)   | 0 (0)   | 0 (0)   | 0 (0)   | 0 (0) | 0 (0)   | 0 (0)  | 0 (0)  | 0 (0)  | 0 (0) | 0 (0)  | 0 (0)  | 0 (0) |
| ENNA1 | 60 (3)  | 60 (3)  | 40 (2)  | 40 (2)  | 60 (3)  | 40 (2)  | 40 (2)  | 40 (2)  | 40 (2)  | 0 (0)   | 0 (0) | 40 (2)  | 0 (0)  | 0 (0)  | 0 (0)  | 0 (0) | 0 (0)  | 20 (1) | 0 (0) |
| ENNB  | 51 (36) | 46 (33) | 32 (23) | 32 (23) | 30 (21) | 25 (18) | 25 (18) | 25 (18) | 24 (17) | 14 (10) | 8 (6) | 4 (3)   | 8 (6)  | 6 (4)  | 4 (3)  | 1 (1) | 3 (2)  | 3 (2)  | 1 (1) |
| ENNB1 | 47 (17) | 44 (16) | 19 (7)  | 25 (9)  | 22 (8)  | 17 (6)  | 19 (7)  | 14 (5)  | 14 (5)  | 6 (2)   | 0 (0) | 6 (2)   | 6 (2)  | 6 (2)  | 0 (0)  | 3 (1) | 3 (1)  | 6 (2)  | 3 (1) |
| ENN   | 51 (36) | 46 (33) | 32 (23) | 32 (23) | 30 (21) | 25 (18) | 25 (18) | 25 (18) | 24 (17) | 14 (10) | 8 (6) | 4 (3)   | 8 (6)  | 6 (4)  | 4 (3)  | 1 (1) | 3 (2)  | 3 (2)  | 1 (1) |
| CUL   | 46 (6)  | 46 (6)  | 15 (2)  | 8 (1)   | 15 (2)  | 8 (1)   | 15 (2)  | 8 (1)   | 8 (1)   | 0 (0)   | 0 (0) | 0 (0)   | 15 (2) | 8 (1)  | 15 (2) | 8 (1) | 0 (0)  | 15 (2) | 8 (1) |
| BEA   | 54 (20) | 49 (18) | 27 (10) | 32 (12) | 24 (9)  | 24 (9)  | 30 (11) | 30 (11) | 27 (10) | 5 (2)   | 5 (2) | 11 (4)  | 11 (4) | 5 (2)  | 8 (3)  | 3 (1) | 3 (1)  | 5 (2)  | 3 (1) |
| STC   | 14 (1)  | 29 (2)  | 14 (1)  | 14 (1)  | 14 (1)  | 14 (1)  | 14 (1)  | 14 (1)  | 14 (1)  | 0 (0)   | 0 (0) | 14 (1)  | 0 (0)  | 0 (0)  | 0 (0)  | 0 (0) | 0 (0)  | 0 (0)  | 0 (0) |
| MON   | 50 (4)  | 25 (2)  | 25 (2)  | 13 (1)  | 0 (0)   | 0 (0)   | 13 (1)  | 13 (1)  | 13 (1)  | 0 (0)   | 0 (0) | 0 (0)   | 25 (2) | 13 (1) | 25 (2) | 0 (0) | 13 (1) | 0 (0)  | 0 (0) |

Key: %, per cent; x, number of positive samples; AFB1, aflatoxin B1; AFG1, aflatoxin G1; AF, total aflatoxins; DON, deoxynivalenol; DON3G, deoxynivalenol-3-glucoside; ZEN, zearalenone;  $\alpha$ ZEL, alpha zearalenol;  $\beta$ ZEL, beta zearalenol; FUMB1, fumonisin B1; FUMB2, fumonisin B2; FUMB, total fumonisins B; ECO, ergocornine; ECR, ergocristine; ENV, ergonovine; ESN, ergosine; ETA, ergotamine;  $\alpha$ ECP, alpha ergocryptine; ERG, total ergot alkaloids; FUSX, fusarenon X; HT2, HT-2 toxin; NEO, neosolaniol; NIV, nivalenol; AOH, alternariol; AME, alternariol methyl ether; ENNA, enniatin A; ENNA1, enniatin A1; ENNB, enniatin B; ENNB1, enniatin B1; ENN, total enniatins; CUL, 15 hydroxy-culmorin; BEA, beauvericin; STC, sterigmatocystin; MON, moniliformin.



| Mycotoxin | Ingredient was | Maize bran | Wheat bran | Dried silver cyprinid fish | Fish meal | Pollard | Fresh water shrimp | Cotton seed cake | Sun flower seed cake | Soya bean cake | Maize germ | Canola seed cake | Cassava | Multi vitamins | Bone meal | Rice bran | Dairy meal | Wheat  | Poultry waste | Rice   |
|-----------|----------------|------------|------------|----------------------------|-----------|---------|--------------------|------------------|----------------------|----------------|------------|------------------|---------|----------------|-----------|-----------|------------|--------|---------------|--------|
|           |                | µg/kg      | µg/kg      | µg/kg                      | µg/kg     | µg/kg   | µg/kg              | µg/kg            | µg/kg                | µg/kg          | µg/kg      | µg/kg            | µg/kg   | µg/kg          | µg/kg     | µg/kg     | µg/kg      | µg/kg  | µg/kg         | µg/kg  |
| ENV       | Present        | <21.9      | <21.9      | <21.9                      | <21.9     | -       | -                  | <21.9            | <21.9                | <21.9          | -          | -                | -       | <21.9          | <21.9     | -         | -          | -      | -             | -      |
|           | Absent         | <21.9      | <21.9      | <21.9                      | <21.9     | <21.9   | <21.9              | <21.9            | <21.9                | <21.9          | <21.9      | <21.9            | <21.9   | <21.9          | <21.9     | <21.9     | <21.9      | <21.9  | <21.9         | <21.9  |
| ESN       | Present        | <38.4      | <38.4      | <38.4                      | <38.4     | <38.4   | <38.4              | <38.4            | <38.4                | <38.4          | -          | -                | <38.4   | <38.4          | <38.4     | -         | -          | -      | -             | -      |
|           | Absent         | 38.5       | 28.9       | 38.5                       | 38.5      | 28.9    | 28.9               | 38.5             | 38.5                 | 38.5           | <38.4      | <38.4            | 28.9    | 28.9           | 28.9      | <38.4     | <38.4      | <38.4  | <38.4         | <38.4  |
| ETA       | Present        | 69.4       | 69.4       | 69.4                       | 69.4      | -       | -                  | 69.4             | 69.4                 | 69.4           | -          | -                | -       | 69.4           | 69.4      | -         | -          | -      | -             | -      |
| αECP      | Absent         | 109.5      | 109.5      | 109.5                      | 109.5     | 87.2    | 87.2               | 109.5            | 109.5                | 109.5          | 87.2       | 87.2             | 87.2    | 109.5          | 109.5     | 87.2      | 87.2       | 87.2   | 87.2          | 87.2   |
|           | Present        | <41        | <41        | <41                        | <41       | <41     | <41                | <41              | <41                  | <41            | <41        | <41              | -       | <41            | <41       | -         | -          | -      | -             | -      |
| ERG       | Absent         | 50.9       | 50.9       | 50.9                       | 50.9      | <41     | <41                | 50.9             | 50.9                 | 50.9           | <41        | <41              | <41     | <41            | <41       | <41       | <41        | <41    | <41           | <41    |
|           | Present        | 51.3       | 49.5       | 52.9                       | 52.9      | 20.5    | 20.5               | 52.9             | 51.2                 | 52.9           | 20.5       | 20.5             | 19.2    | 111.7          | 111.7     | -         | 64.3       | -      | -             | -      |
| FUSX      | Absent         | 63.8       | 61.4       | 59.0                       | 59.0      | 60.9    | 61.4               | 59.0             | 59.5                 | 59.0           | 59.0       | 59.0             | 59.0    | 54.9           | 54.9      | 58.5      | 55.7       | 58.5   | 58.5          | 58.5   |
|           | Present        | <56        | <56        | <56                        | <56       | <56     | -                  | <56              | <56                  | <56            | -          | -                | -       | <56            | <56       | -         | -          | -      | -             | -      |
| HT2       | Absent         | <56        | <56        | <56                        | <56       | <56     | <56                | <56              | <56                  | <56            | <56        | <56              | <56     | <56            | <56       | <56       | <56        | <56    | <56           | <56    |
|           | Present        | <41.6      | <41.6      | <41.6                      | <41.6     | <41.6   | <41.6              | <41.6            | <41.6                | <41.6          | 216.3      | <41.6            | <41.6   | <41.6          | <41.6     | -         | -          | -      | -             | <41.6  |
| NEO       | Absent         | <41.6      | <41.6      | <41.6                      | <41.6     | <41.6   | <41.6              | <41.6            | <41.6                | <41.6          | <41.6      | <41.6            | <41.6   | <41.6          | <41.6     | <41.6     | <41.6      | <41.6  | <41.6         | <41.6  |
|           | Present        | <177.7     | <177.7     | <177.7                     | <177.7    | <177.7  | <177.7             | <177.7           | <177.7               | <177.7         | <177.7     | <177.7           | -       | -              | -         | -         | -          | -      | -             | <177.7 |
| NIV       | Absent         | <177.7     | <177.7     | <177.7                     | <177.7    | <177.7  | <177.7             | <177.7           | <177.7               | <177.7         | <177.7     | <177.7           | <177.7  | <177.7         | <177.7    | <177.7    | <177.7     | <177.7 | <177.7        | <177.7 |
|           | Present        | <40.3      | 67.4       | 44.3                       | 68.4      | 43.2    | -                  | 67.4             | 68.4                 | 68.4           | -          | -                | -       | 44.3           | 68.4      | <40.3     | 67.1       | <40.3  | -             | 66.3   |
| AOH       | Absent         | 69.8       | 64.4       | 66.3                       | 65.4      | 68.4    | 66.3               | 64.4             | 65.4                 | 65.4           | 66.3       | 66.3             | 66.3    | 66.3           | 65.4      | 67.4      | 66.3       | 67.4   | 66.3          | 66.4   |
|           | Present        | <36.2      | <36.2      | <36.2                      | <36.2     | <36.2   | <36.2              | <36.2            | <36.2                | <36.2          | -          | -                | 43.3    | <36.2          | <36.2     | <36.2     | <36.2      | -      | -             | <36.2  |
| AME       | Absent         | <36.2      | <36.2      | <36.2                      | <36.2     | <36.2   | <36.2              | <36.2            | <36.2                | <36.2          | <36.2      | <36.2            | <36.2   | <36.2          | <36.2     | <36.2     | <36.2      | <36.2  | <36.2         | <36.2  |
|           | Present        | 94.5       | 94.5       | 94.5                       | 94.5      | 94.5    | 94.5               | 94.5             | 94.5                 | 94.5           | -          | -                | 94.5    | -              | -         | -         | -          | -      | -             | -      |
| ENNA      | Absent         | -          | -          | -                          | -         | -       | -                  | -                | -                    | -              | 94.5       | 94.5             | -       | 94.5           | 94.5      | 94.5      | 94.5       | 94.5   | 94.5          | 94.5   |
|           | Present        | -          | -          | -                          | -         | <26.1   | -                  | -                | -                    | -              | -          | -                | -       | -              | -         | -         | <26.1      | -      | -             | -      |
| ENNA1     | Absent         | <26.1      | <26.1      | <26.1                      | <26.1     | <26.1   | <26.1              | <26.1            | <26.1                | <26.1          | <26.1      | <26.1            | <26.1   | <26.1          | <26.1     | <26.1     | <26.1      | <26.1  | <26.1         | <26.1  |
|           | Present        | <13.5      | <13.5      | <13.5                      | <13.5     | <13.5   | <13.5              | <13.5            | <13.5                | <13.5          | -          | -                | <13.5   | -              | -         | -         | 23.8       | -      | <13.5         | -      |
| ENNB      | Absent         | 15.3       | 15.3       | 14.7                       | 14.7      | 10.7    | 14.7               | 14.7             | 14.7                 | 14.7           | <13.5      | <13.5            | 14.7    | <13.5          | <13.5     | <13.5     | <13.5      | <13.5  | 10.7          | <13.5  |
|           | Present        | <38.8      | <38.8      | <38.8                      | <38.8     | <38.8   | <38.8              | <38.8            | <38.8                | <38.8          | <38.8      | <38.8            | <38.8   | <38.8          | 51.4      | <38.8     | <38.8      | <38.8  | <38.8         | 41.6   |

| Mycotoxin | Ingredient was | Maize bran | Wheat bran | Dried silver cyprinid fish | Fish meal | Pollard | Fresh water shrimp | Cotton seed cake | Sun flower seed cake | Soya bean cake | Maize germ | Canola seed cake | Cassava | Multi vitamins | Bone meal | Rice bran | Dairy meal | Wheat  | Poultry waste | Rice  |
|-----------|----------------|------------|------------|----------------------------|-----------|---------|--------------------|------------------|----------------------|----------------|------------|------------------|---------|----------------|-----------|-----------|------------|--------|---------------|-------|
|           |                | µg/kg      | µg/kg      | µg/kg                      | µg/kg     | µg/kg   | µg/kg              | µg/kg            | µg/kg                | µg/kg          | µg/kg      | µg/kg            | µg/kg   | µg/kg          | µg/kg     | µg/kg     | µg/kg      | µg/kg  | µg/kg         | µg/kg |
| ENNB1     | Absent         | <38.8      | <38.8      | <38.8                      | <38.8     | <38.8   | <38.8              | <38.8            | <38.8                | <38.8          | <38.8      | <38.8            | <38.8   | <38.8          | <38.8     | <38.8     | <38.8      | <38.8  | <38.8         | <38.8 |
|           | Present        | 19.6       | 25.4       | 26.8                       | 26.3      | 26.6    | 26.6               | 22.8             | 26.8                 | 26.8           | 30.1       | -                | 18.2    | 22.9           | 22.9      | -         | 16.0       | 19.6   | 19.8          | 22.8  |
| ENN       | Absent         | 23.5       | 19.4       | 19.9                       | 22.8      | 19.8    | 21.4               | 23.5             | 22.8                 | 22.8           | 21.4       | 23.2             | 23.2    | 23.2           | 23.2      | 23.2      | 23.5       | 23.5   | 23.2          | 23.5  |
|           | Present        | 35.6       | 37.8       | 32.6                       | 37.8      | 32.6    | 26.0               | 40.1             | 35.2                 | 37.8           | 19.4       | 19.4             | 32.6    | 42.3           | 65.1      | 19.4      | 35.4       | 29.2   | 42.5          | 64.4  |
| CUL       | Absent         | 49.8       | 36.1       | 37.2                       | 36.3      | 37.7    | 37.8               | 35.8             | 36.8                 | 36.4           | 37.6       | 37.6             | 37.2    | 36.0           | 35.8      | 37.7      | 37.2       | 36.8   | 36.8          | 36.4  |
|           | Present        | 153.7      | 132.5      | 117.8                      | 84.1      | 149.5   | 155.9              | 98.8             | 84.1                 | 84.1           | -          | -                | -       | 117.8          | 84.1      | 113.4     | 185.4      | -      | 222.3         | 113.5 |
| BEA       | Absent         | 113.5      | 141.6      | 141.6                      | 146.6     | 141.6   | 127.6              | 151.5            | 146.6                | 146.6          | 141.6      | 141.6            | 141.6   | 141.6          | 146.6     | 141.6     | 127.6      | 141.6  | 113.5         | 146.6 |
|           | Present        | 28.2       | 35.0       | 21.2                       | <15.9     | 31.4    | 16.0               | <15.9            | 16.0                 | 22.6           | <15.9      | <15.9            | 39.9    | 21.2           | 152.3     | 34.4      | 31.4       | 137.7  | 54.4          | 69.2  |
| STC       | Absent         | 35.6       | 31.4       | 35.6                       | 35.6      | 35.0    | 35.0               | 35.0             | 35.0                 | 34.4           | 35.6       | 35.6             | 31.4    | 35.6           | 34.4      | 33.5      | 35.0       | 32.9   | 34.4          | 32.9  |
|           | Present        | 162.5      | 1839.8     | 162.5                      | 162.5     | 162.5   | 162.5              | 162.5            | 162.5                | 162.5          | -          | -                | 162.5   | -              | -         | -         | <30.5      | -      | -             | -     |
| MON       | Absent         | <30.5      | <30.5      | <30.5                      | <30.5     | <30.5   | <30.5              | <30.5            | <30.5                | <30.5          | <30.5      | <30.5            | <30.5   | <30.5          | <30.5     | <30.5     | 162.5      | <30.5  | <30.5         | <30.5 |
|           | Present        | 719.4      | 741.8      | 741.8                      | 257.6     | -       | -                  | 257.6            | 257.6                | 257.6          | -          | -                | -       | 741.8          | 257.6     | 761.1     | 641.3      | <218.9 | -             | -     |
|           | Absent         | 530.4      | 530.4      | 530.4                      | 641.3     | 530.4   | 530.4              | 641.3            | 641.3                | 641.3          | 530.4      | 530.4            | 530.4   | 530.4          | 641.3     | 530.4     | 419.4      | 641.3  | 530.4         | 530.4 |

Key: %, per cent; AFB1, aflatoxin B1; AFG1, aflatoxin G1; AF, total aflatoxins; DON, deoxynivalenol; DON3G, deoxynivalenol-3-glucoside; ZEN, zearalenone; αZEL, alpha zearalenol; βZEL, beta zearalenol; FUMB1, fumonisin B1; FUMB2, fumonisin B2; FUMB, total fumonisins B; ECO, ergocornine; ECR, ergocristine; ENV, ergonovine; ESN, ergosine; ETA, ergotamine; αECP, alpha ergocryptine; ERG, total ergot alkaloids; FUSX, fusarenon X; HT2, HT-2 toxin; NEO, neosolaniol; NIV, nivalenol; AOH, alternariol; AME, alternariol methyl ether; ENNA, enniatin A; ENNA1, enniatin A1; ENNB, enniatin B; ENNB1, enniatin B1; ENN, total enniatins; CUL, 15 hydroxy-culmorin; BEA, beauvericin; STC, sterigmatocystin; MON, moniliformin; \*, p≤0.05.

**Table S7.** Performance parameters of the multi-mycotoxin HPLC-HRMS method used.

| Mycotoxins                       | LOD<br>µg/kg | LOQ<br>µg/kg | $r^2$  | Recovery<br>% | SSE<br>% |
|----------------------------------|--------------|--------------|--------|---------------|----------|
| Aflatoxins                       |              |              |        |               |          |
| AFB1                             | 14.7         | 49.1         | 0.9999 | 79.8          | 87.1     |
| AFG1                             | 155.8        | 519.3        | 0.9995 | 51.6          | 84.6     |
| AFB2                             | 18.1         | 60.4         | 0.9999 | 78.8          | 82.4     |
| AFG2                             | 152.9        | 509.7        | 0.9994 | 44.8          | 88.9     |
| Deoxynivalenol and its analogues |              |              |        |               |          |
| DON                              | 40.4         | 134.8        | 0.9991 | 107.1         | 195.7    |
| DON3G                            | 46.8         | 156.1        | 0.9993 | 58.2          | 252.4    |
| 3ADON                            | 36.0         | 119.9        | 1.0000 | 87.7          | 77.7     |
| 15ADON                           | 122.7        | 409          | 0.9993 | 119.8         | 35.5     |
| Zearalenone and its analogues    |              |              |        |               |          |
| ZEN                              | 38.0         | 126.6        | 0.9995 | 119.1         | 78.2     |
| αZEL                             | 22.2         | 73.9         | 0.9995 | 132.6         | 68.4     |
| βZEL                             | 16.0         | 53.3         | 0.9994 | 133.8         | 69.7     |
| Fumonisin                        |              |              |        |               |          |
| FUMB1                            | 63.0         | 209.9        | 0.9977 | 52.5          | 61.4     |
| FUMB2                            | 68.9         | 229.7        | 0.9995 | 57.2          | 68.1     |
| Ergot alkaloids                  |              |              |        |               |          |
| ECO                              | 20.7         | 69.1         | 0.9993 | 129.7         | 172.6    |
| ECR                              | 24.9         | 83.0         | 0.9990 | 142.6         | 227.1    |
| ENV                              | 21.9         | 73.1         | 0.9999 | 84.2          | 49.6     |
| ESN                              | 38.4         | 128.2        | 0.9996 | 108.8         | 132.7    |
| ETA                              | 29.3         | 97.6         | 0.9987 | 122.1         | 160.8    |
| αECP                             | 41.0         | 136.6        | 0.9988 | 136.1         | 231.7    |
| Other trichothecenes             |              |              |        |               |          |
| FUSX                             | 56.0         | 186.6        | 0.9997 | 106.3         | 114.5    |
| HT2                              | 41.6         | 138.7        | 0.9992 | 119.7         | 89.1     |
| T2                               | 58.2         | 194.1        | 1.0000 | 120.2         | 103.2    |
| T2 triol                         | 122.7        | 409.0        | 0.9975 | 121.9         | 108.9    |
| T2 tetraol                       | 41.9         | 139.8        | 0.9998 | 78.5          | 100.0    |
| NEO                              | 177.7        | 592.4        | 0.9999 | 139.8         | 81.0     |
| NIV                              | 40.3         | 134.2        | 0.9995 | 43.7          | 285.4    |
| DAS                              | 33.9         | 113.1        | 0.9994 | 118.9         | 78.4     |
| Alternariol and its analogues    |              |              |        |               |          |
| AOH                              | 36.2         | 120.8        | 0.9953 | 81.6          | 59.3     |
| AME                              | 16.4         | 54.7         | 0.9953 | 81.6          | 66.7     |
| Enniatins                        |              |              |        |               |          |
| ENNA                             | 26.1         | 87.2         | 0.9980 | 138           | 263.2    |

| Mycotoxins       | LOD<br>µg/kg | LOQ<br>µg/kg | r <sup>2</sup> | Recovery<br>% | SSE<br>% |
|------------------|--------------|--------------|----------------|---------------|----------|
| ENNA1            | 13.5         | 44.9         | 0.9988         | 141.3         | 282.4    |
| ENNB             | 38.8         | 129.4        | 0.9993         | 128.6         | 165.9    |
| ENNB1            | 12.9         | 43.1         | 0.9992         | 134.6         | 211.6    |
| Other mycotoxins |              |              |                |               |          |
| CUL              | 42.3         | 141.0        | 0.9998         | 120.3         | 83.4     |
| BEA              | 15.9         | 53.2         | 0.9990         | 133.5         | 202.4    |
| STC              | 30.5         | 101.6        | 0.9994         | 127.3         | 116.0    |
| MON              | 218.9        | 729.6        | 0.9891         | 71.8          | 100.0    |
| BUT              | 149.2        | 497.3        | 0.9998         | 145.4         | 100.0    |
| AOD              | 30.9         | 103.0        | 0.9891         | 78.9          | 183.9    |
| OTA              | 27.3         | 91.1         | 0.9999         | 103.4         | 123.4    |

Key: LOD, Limit of detection; LOQ, Limit of quantification; <, less than; r<sup>2</sup>, calibration curve regression coefficient; SSE, Signal Suppression or Enhancement; µg/kg, micrograms per kilogram; %, per cent; AFB1, aflatoxin B1; AFG1, aflatoxin G1; AFB2, aflatoxin B2; AFG2, aflatoxin G2; DON, deoxynivalenol; DON3G, deoxynivalenol 3-glucoside; 3ADON, 3-acetyldeoxynivalenol; 15ADON, 15-acetyldeoxynivalenol; ZEN, zearalenone; αZEL, alpha zearalenol; βZEL, beta zearalenol; FUMB1, fumonisin B1; FUMB2, fumonisin B2; ECO, ergocornine; ECR, ergocristine; ENV, ergonovine; ESN, ergosine; ETA, ergotamine; αECP, alpha ergocryptine; FUSX, fusarenon X; HT2, HT-2 toxin; T2, T-2 toxin; NEO, neosolaniol; NIV, nivalenol; DAS, diacetoxyscirpenol; AOH, alternariol; AME, alternariol methyl ether; ENNA, enniatin A; ENNA1, enniatin A1; ENNB, enniatin B; ENNB1, enniatin B1; CUL, 15-hydroxy-culmorin; BEA, beauvericin; STC, sterigmatocystin; MON, moniliformin; BUT, 5-acetamido-butenolide; AOD, 2-amino-14,16-dimethyloctadecan-3-ol; OTA, ochratoxin.
